# Supplementary material for: Preoperative High C-Reactive Protein to Albumin Ratio Predicts Short- and Long-Term Postoperative Outcomes in Elderly Gastric Cancer Patients
Source: MDPI journal article supplement (doi:10.3390/cancers16030616), 2024-01-31
Supplement: s1 [file s1]

**Supplemental Table S1.** Comparison of the characteristics between the CAR high and low group.

|                             | CAR-high ( $\geq 0.024$ ) group<br>(n = 215) | CAR-low ( $< 0.024$ ) group<br>(n = 356) | p-value           |
|-----------------------------|----------------------------------------------|------------------------------------------|-------------------|
| Age                         | 71 (21-89)                                   | 68 (33-89)                               | <b>&lt; 0.001</b> |
| Sex                         |                                              |                                          | 0.135             |
| Male                        | 156 (72.6)                                   | 237 (66.6)                               |                   |
| Female                      | 59 (27.4)                                    | 119 (33.4)                               |                   |
| BMI                         | 22.5 (15.2-32.9)                             | 22.0 (14.5-31.2)                         | 0.404             |
| ASA-PS                      |                                              |                                          | <b>&lt; 0.001</b> |
| 1                           | 11 (5.1)                                     | 50 (14.0)                                |                   |
| 2                           | 176 (81.9)                                   | 294 (82.6)                               |                   |
| 3                           | 28 (13.0)                                    | 12 (3.4)                                 |                   |
| Charlson Comorbidity Index* |                                              |                                          | <b>&lt; 0.001</b> |
| Low: 0                      | 95 (44.2)                                    | 231 (64.9)                               |                   |
| Medium: 1-2                 | 85 (39.5)                                    | 102 (28.7)                               |                   |
| High: 3-4                   | 28 (13.0)                                    | 19 (5.3)                                 |                   |
| Very high: $\geq 5$         | 7 (3.3)                                      | 4 (1.1)                                  |                   |
| Location of tumor           |                                              |                                          | 0.788             |
| Upper                       | 83 (38.6)                                    | 138 (38.8)                               |                   |
| Middle                      | 75 (34.9)                                    | 132 (37.1)                               |                   |
| Low                         | 57 (26.5)                                    | 86 (24.1)                                |                   |
| Histopathological type**    |                                              |                                          | <b>&lt; 0.001</b> |
| Differentiated              | 127 (59.1)                                   | 154 (43.3)                               |                   |
| Undifferentiated            | 88 (40.9)                                    | 202 (56.7)                               |                   |
| Depth of tumor***           |                                              |                                          | <b>0.002</b>      |
| T1a-1b                      | 137 (63.7)                                   | 256 (71.9)                               |                   |
| T2                          | 19 (8.8)                                     | 46 (12.9)                                |                   |
| T3                          | 34 (15.8)                                    | 26 (7.3)                                 |                   |
| T4a-4b                      | 25 (11.6)                                    | 28 (7.9)                                 |                   |
| Lymph node metastasis***    |                                              |                                          | <b>0.027</b>      |
| N0                          | 148 (79.2)                                   | 282 (79.2)                               |                   |
| N1                          | 28 (13.0)                                    | 33 (9.3)                                 |                   |
| N2                          | 22 (10.2)                                    | 18 (5.1)                                 |                   |
| N3                          | 17 (7.9)                                     | 23 (6.5)                                 |                   |
| Pathological stage***       |                                              |                                          | <b>0.004</b>      |
| I                           | 145 (67.4)                                   | 284 (79.8)                               |                   |
| II                          | 29 (13.5)                                    | 32 (9.0)                                 |                   |
| III                         | 41 (19.1)                                    | 40 (11.2)                                |                   |

Variables in bold are statistically significant ( $P < 0.05$ ). Categorical variables were described using frequencies and percentages and continuous variables were described using median and range.

\* Charlson Comorbidity Index were defined by only comorbidities without adjusting age. \*\* Differentiated type and undifferentiated type involved papillary carcinoma, tubular adenocarcinoma and poorly differentiated adenocarcinoma, mucinous adenocarcinoma, signet-ring cell carcinoma, respectively. \*\*\* According

to the 15th edition of the Japanese Classification of Gastric Carcinoma.

Abbreviation: ASA-PS, American society of anesthesiologists physical status; BMI, body mass index; CAR, C-reactive protein/albumin ratio; CD, Clavien-Dindo classification
